# Supplementary material for: Overexpression of DGAT2 Regulates the Differentiation of Bovine Preadipocytes
Source: MDPI journal article supplement (doi:10.3390/ani13071195), 2023-03-29
Supplement: s1 [file s1]

# Overexpression of DGAT2 Regulates the Differentiation of Bovine Preadipocytes

Pan-Pan Guo , Xin Jin, Jun-Fang Zhang, Qiang Li, Chang-Guo Yan and Xiang-Zi Li 1,\*

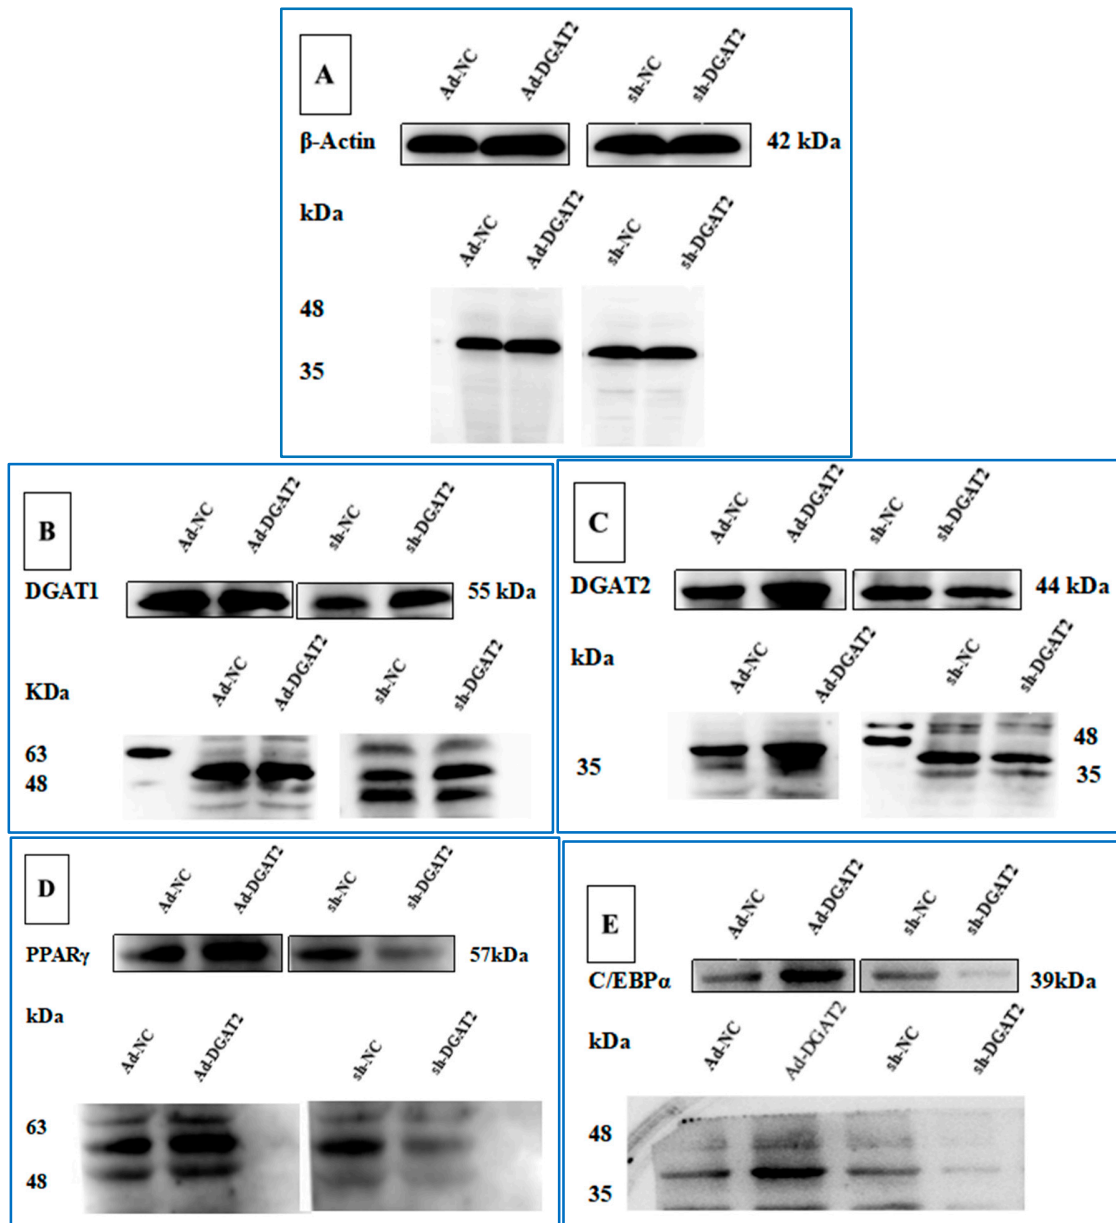

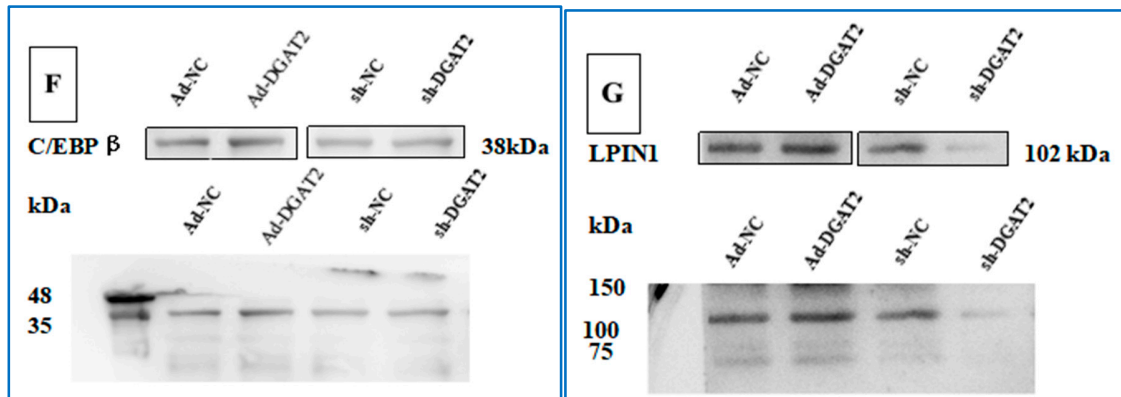

**Figure S1.** The original figure of the upper blot membrane of Figure 4D and 5D. The original western blot of  $\beta$ -actin (A), DGAT1 (B), DGAT2 (C), PPAR $\gamma$  (D), C/EBP $\alpha$  (E), C/EBP $\beta$  (F), LPIN1 (G) protein in adipocytes transfected with Ad-DGAT2/Ad-NC and sh-DGAT2/sh-NC.

**Table S1:** Sequence information of PCR primers and Full length of CDS region sequence of DGAT2 gene in Yanbian cattle

| Genes    | Primer sequences(5→3')                                                                                                                                                                                                                                                                                                                                                                                                                                                                                                                                                                                                                                                                                                                                                                                                                                                                                                                                                                                                                                                                                                                                                                             | Product size/bp | Annealing temperature/°C | GenBank Accession No. |
|----------|----------------------------------------------------------------------------------------------------------------------------------------------------------------------------------------------------------------------------------------------------------------------------------------------------------------------------------------------------------------------------------------------------------------------------------------------------------------------------------------------------------------------------------------------------------------------------------------------------------------------------------------------------------------------------------------------------------------------------------------------------------------------------------------------------------------------------------------------------------------------------------------------------------------------------------------------------------------------------------------------------------------------------------------------------------------------------------------------------------------------------------------------------------------------------------------------------|-----------------|--------------------------|-----------------------|
| DGAT2    | F:TGAACCGGGACACCATAGACTACTTG<br>R:TCAGTTCACCTCCAGGACCTCG                                                                                                                                                                                                                                                                                                                                                                                                                                                                                                                                                                                                                                                                                                                                                                                                                                                                                                                                                                                                                                                                                                                                           | 1086            | 65                       | NM_205793.2           |
| Sequence | ATGAAGACCCTCATAGCCGCTACTCCGGGGTCCTGCGAGGCACTGGCTCCAGCATCCT<br>CTCTGCCCTCCAGGACCTGTTTTCTGTCACTTGGCTCAATAGGTCCAAGGTAGAGAAGCA<br>GCTCCAAGTCATCTCGGTGCTACAATGGGTCCTGTCTTTCCTCGTGCTGGGAGTGGCCTG<br>CAGCGTCATCCTCATGTACACATTCTGCACCGATTGCTGGCTCATTGCCGTGCTCTACTTC<br>ACCTGGCTGGTGTGTTGACTGGAACACACCCAAGAAAGGTGGCAGGAGGTACAGTGGG<br>TCCGAAACTGGGCTGTGTGGCGCTACTTTCGAGACTACTTCCCATTACAGCTGGTGAAGA<br>CACACAACCTTACTGACCAGCAGGAACTACATCTTTGGGTACCATCCCCATGGCATCATG<br>GGCTGGGTGCCTTCTGCAACTTCAGCACAGAGGCCACAGAAGTAAGCAAGAAGTTCCC<br>TGGCATAAGGCCCTACCTGGCCACGCTGGCCGGCAACTTCCGGATGCCAGTGCTGCGGG<br>AGTACCTGATGTCTGGAGGCATCTGCCAGTGAACCGGGACACCATAGACTACTTGCTTT<br>CAAAGAATGGGAGTGGCAATGCCATCATCATCGTGTTGGGGGGCGCGGCTGAATCCCTG<br>AGCTCCATGCCCCGCAAGAATGCAGTCACCTGCGCAATCGCAAGGGCTTTGTGAAACT<br>GGCCCTGCGCCATGGAGCCGACCTGGTTCCCACCTACTCCTTTGGGGAGAATGAGGTGT<br>ACAAGCAGGTGATCTTTGAGGAGGGCTCCTGGGGCCGGTGGGTGCAGAAGAAGTTCCA<br>GAAGTACATTGGCTTTGCCCCATGCATCTTCCATGGTCGAGGCCTCTTCTCCTCTGACACC<br>TGGGGGCTGGTGGCCTACTCCAAGCCCATCACCAGTGTCTGTGGGCGAGCCCATACCAT<br>CCCCAGGCTGGAGCGCCCGACGCAGCAGGACATCGACCTGTACCACGCCATGTACGTG<br>CAAGCCCTGGTGAAGCTCTTCGACCAGCATAAGACCAAGTTCGGCCTCCCGGAGACCGA<br>GGTCTGGAGGTGAACTGA |                 |                          |                       |

**Table S2.** Information of clean data.

| <b>Sample</b> | <b>Trimmed_Read_Number</b> | <b>Trimmed_Bases</b> | <b>Useful_read%</b> | <b>Useful_bases%</b> |
|---------------|----------------------------|----------------------|---------------------|----------------------|
| Ad-DGAT2-1    | 41957774                   | 6293666100           | 90.49               | 90.49                |
| Ad-DGAT2-2    | 46692432                   | 7003864800           | 90.25               | 90.25                |
| Ad-DGAT2-3    | 45059410                   | 6758911500           | 89.56               | 89.56                |
| Ad-NC-1       | 46123688                   | 6918553200           | 90.33               | 90.33                |
| Ad-NC-2       | 48540484                   | 7281072600           | 90.97               | 90.97                |
| Ad-NC-3       | 47456602                   | 7118490300           | 91.47               | 91.47                |
| sh-NC-1       | 47383396                   | 7107509400           | 90.52               | 90.52                |
| sh-NC-2       | 43421586                   | 6513237900           | 90.92               | 90.92                |
| sh-NC-3       | 41991732                   | 6298759800           | 90.15               | 90.15                |
| sh-DGAT2-1    | 50881030                   | 7632154500           | 89.97               | 89.97                |
| sh-DGAT2-2    | 41109628                   | 6166444200           | 90.9                | 90.9                 |
| sh-DGAT2-3    | 43272494                   | 6490874100           | 88.08               | 88.08                |

**Table S3.** Summary of sequencing data and reference genome comparison.

| <b>Sample</b> | <b>Clean Reads</b> | <b>Total Mapped</b>  | <b>Multiple Mapped</b> | <b>Uniquely Mapped</b> | <b>Map Events</b> | <b>Mapped to Gene</b> | <b>Mapped to InterGene</b> | <b>Mapped to Exon</b> |
|---------------|--------------------|----------------------|------------------------|------------------------|-------------------|-----------------------|----------------------------|-----------------------|
| sh-NC-1       | 47383396           | 45346415<br>(95.70%) | 1243402<br>(2.74%)     | 44103013<br>(97.26%)   | 44103013          | 37110627<br>(84.15%)  | 6992386<br>(15.85%)        | 33656706<br>(90.69%)  |
| sh-NC-2       | 43421586           | 41492311<br>(95.56%) | 1132667<br>(2.73%)     | 40359644<br>(97.27%)   | 40359644          | 33788214<br>(83.72%)  | 6571430<br>(16.28%)        | 30673434<br>(90.78%)  |
| sh-NC-3       | 41991732           | 40078263<br>(95.44%) | 1032503<br>(2.58%)     | 39045760<br>(97.42%)   | 39045760          | 32844563<br>(84.12%)  | 6201197<br>(15.88%)        | 29889150<br>(91.00%)  |
| Ad-NC-1       | 46123688           | 43994995<br>(95.38%) | 1400082<br>(3.18%)     | 42594913<br>(96.82%)   | 42594913          | 35641438<br>(83.68%)  | 6953475<br>(16.32%)        | 32542118<br>(91.30%)  |
| Ad-NC-2       | 48540484           | 46377795<br>(95.54%) | 1383335<br>(2.98%)     | 44994460<br>(97.02%)   | 44994460          | 37616399<br>(83.60%)  | 7378061<br>(16.40%)        | 34420035<br>(91.50%)  |
| Ad-NC-3       | 47456602           | 45389952<br>(95.65%) | 1643704<br>(3.62%)     | 43746248<br>(96.38%)   | 43746248          | 36577634<br>(83.61%)  | 7168614<br>(16.39%)        | 33848556<br>(92.54%)  |
| Ad-DGAT2-1    | 41957774           | 40124294<br>(95.63%) | 1200506<br>(2.99%)     | 38923788<br>(97.01%)   | 38923788          | 32390894<br>(83.22%)  | 6532894<br>(16.78%)        | 29422088<br>(90.83%)  |
| Ad-DGAT2-2    | 46692432           | 44489772<br>(95.28%) | 1303662<br>(2.93%)     | 43186110<br>(97.07%)   | 43186110          | 35978292<br>(83.31%)  | 7207818<br>(16.69%)        | 32729531<br>(90.97%)  |
| Ad-DGAT2-3    | 45059410           | 43080975<br>(95.61%) | 1329255<br>(3.09%)     | 41751720<br>(96.91%)   | 41751720          | 34822208<br>(83.40%)  | 6929512<br>(16.60%)        | 31740502<br>(91.15%)  |
| sh-DGAT2-1    | 50881030           | 48642046<br>(95.60%) | 1740615<br>(3.58%)     | 46901431<br>(96.42%)   | 46901431          | 38936622<br>(83.02%)  | 7964809<br>(16.98%)        | 35376210<br>(90.86%)  |
| sh-DGAT2-2    | 41109628           | 39315425<br>(95.64%) | 1004356<br>(2.55%)     | 38311069<br>(97.45%)   | 38311069          | 31978328<br>(83.47%)  | 6332741<br>(16.53%)        | 29086478<br>(90.96%)  |
| sh-DGAT2-3    | 43272494           | 41349412<br>(95.56%) | 1126742<br>(2.72%)     | 40222670<br>(97.28%)   | 40222670          | 33893908<br>(84.27%)  | 6328762<br>(15.73%)        | 30933390<br>(91.27%)  |
